# Supplementary material for: Influence of the synthetic conditions on a formation of 1-D, 2-D and 3-D copper–chloride coordination polymers
Source: Royal Society of Chemistry journal article supplement (doi:10.1039/d1ce01048d), 2021-01-01
Supplement: d1ce01048d1.pdf [file d1ce01048d1.pdf]

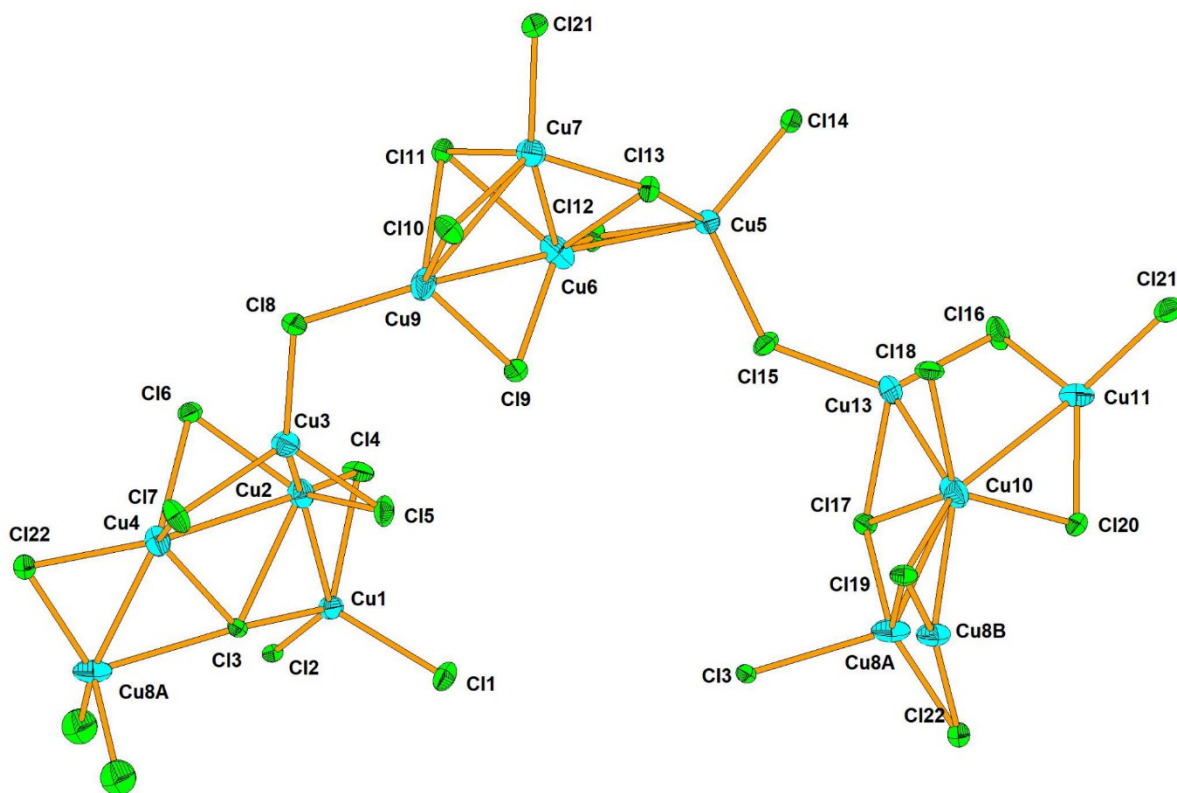

Figure S1. Inorganic part of compound **III**. Thermal ellipsoids are drawn at the 50% probability level.  $H_2dabco$  cations and water molecule are omitted for clarity. Only crystallographically independent atoms are labeled.

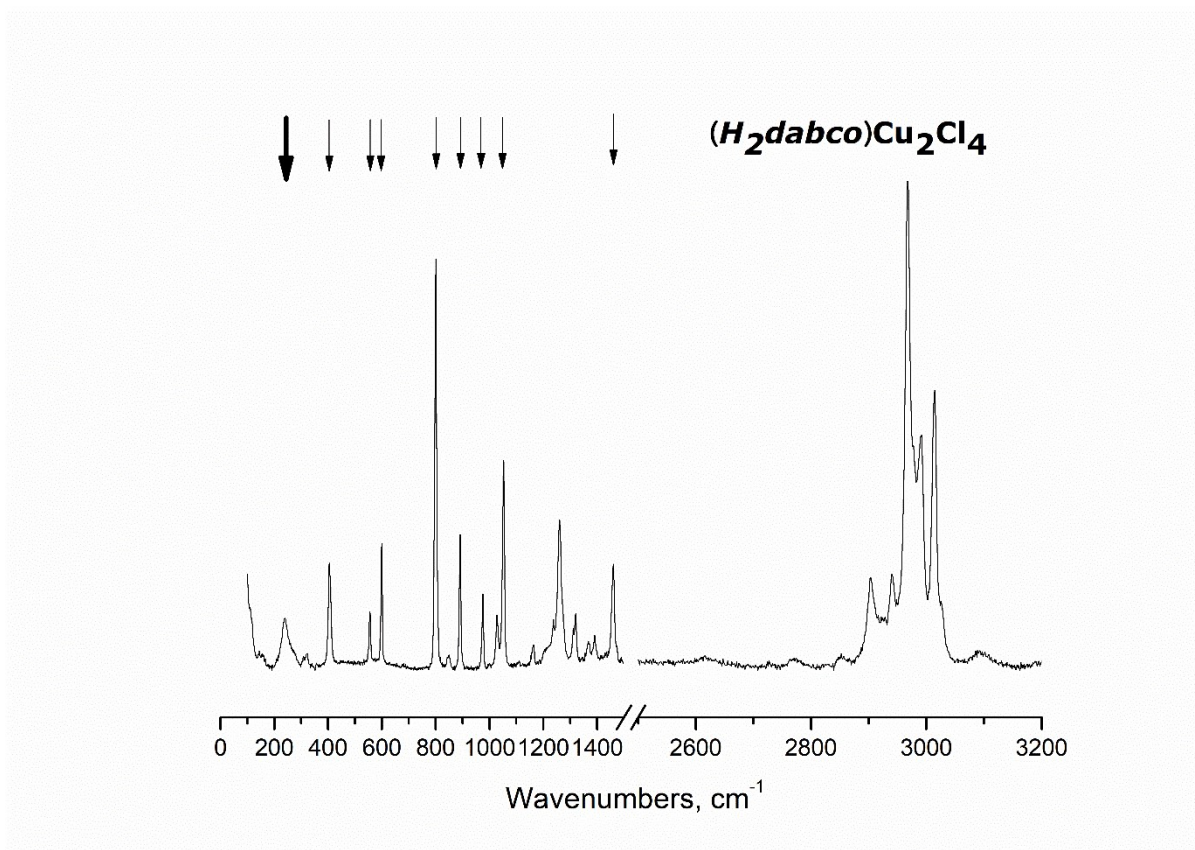

Figure S2. Raman-spectrum of  $(H_2dabco)Cu_2Cl_4$  compound. Thin arrows depict peaks originated from organic part, thick arrow marks  $\nu_5$  mode of the copper-chlorine anion.

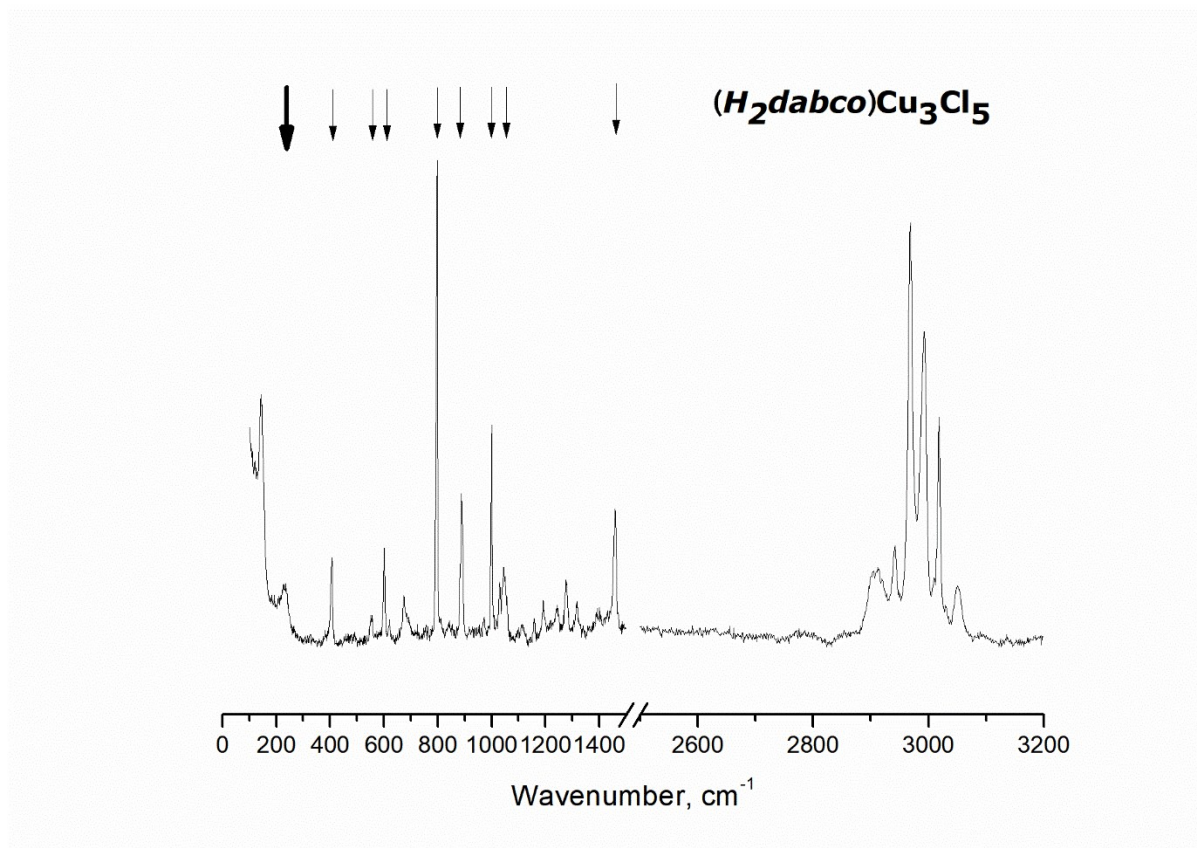

Figure S3. Raman-spectrum of  $(H_2dabco)Cu_3Cl_5$  compound. Thin arrows depict peaks originated from organic part, thick arrow marks  $\nu_5$  mode of the copper-chlorine anion.

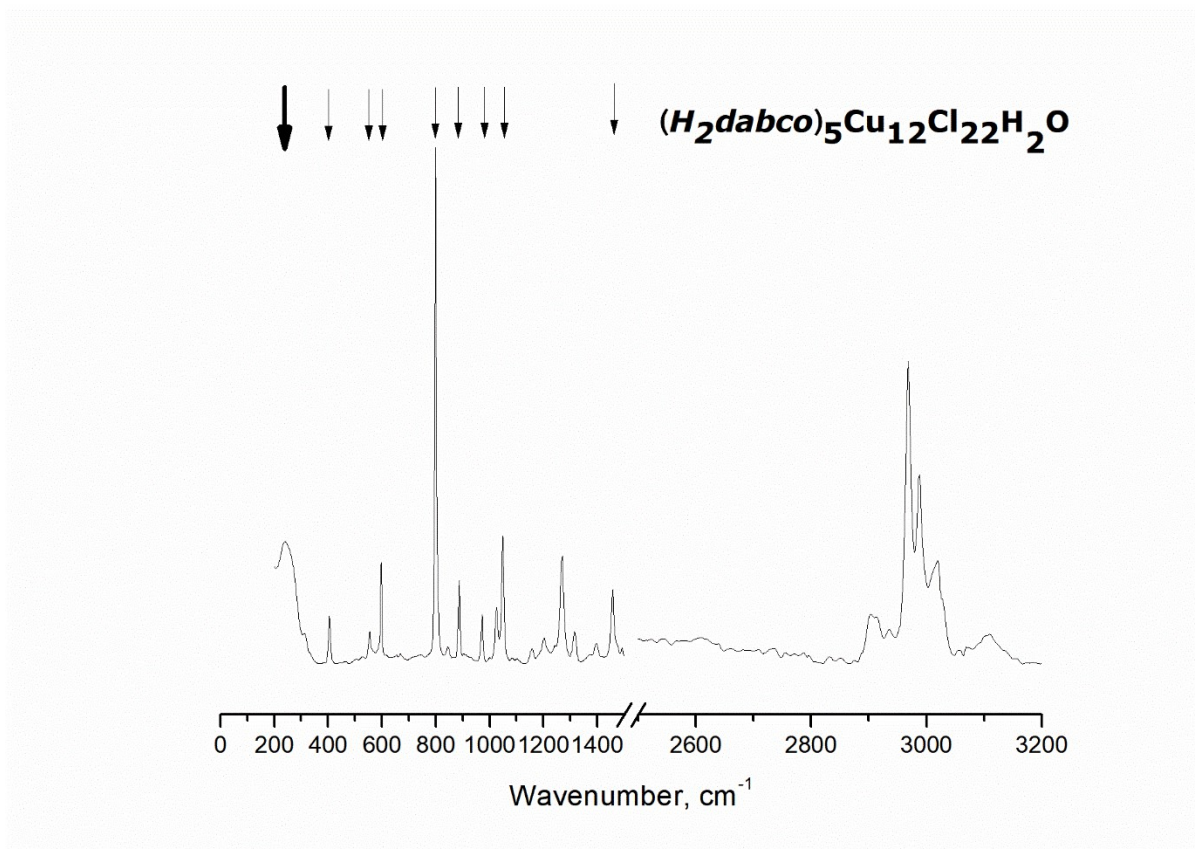

Figure S4. Raman-spectrum of  $(H_2dabco)_5Cu_{12}Cl_{22} \cdot H_2O$  compound. Thin arrows depict peaks originated from organic part, thick arrow marks  $\nu_s$  mode of the copper-chlorine anion.

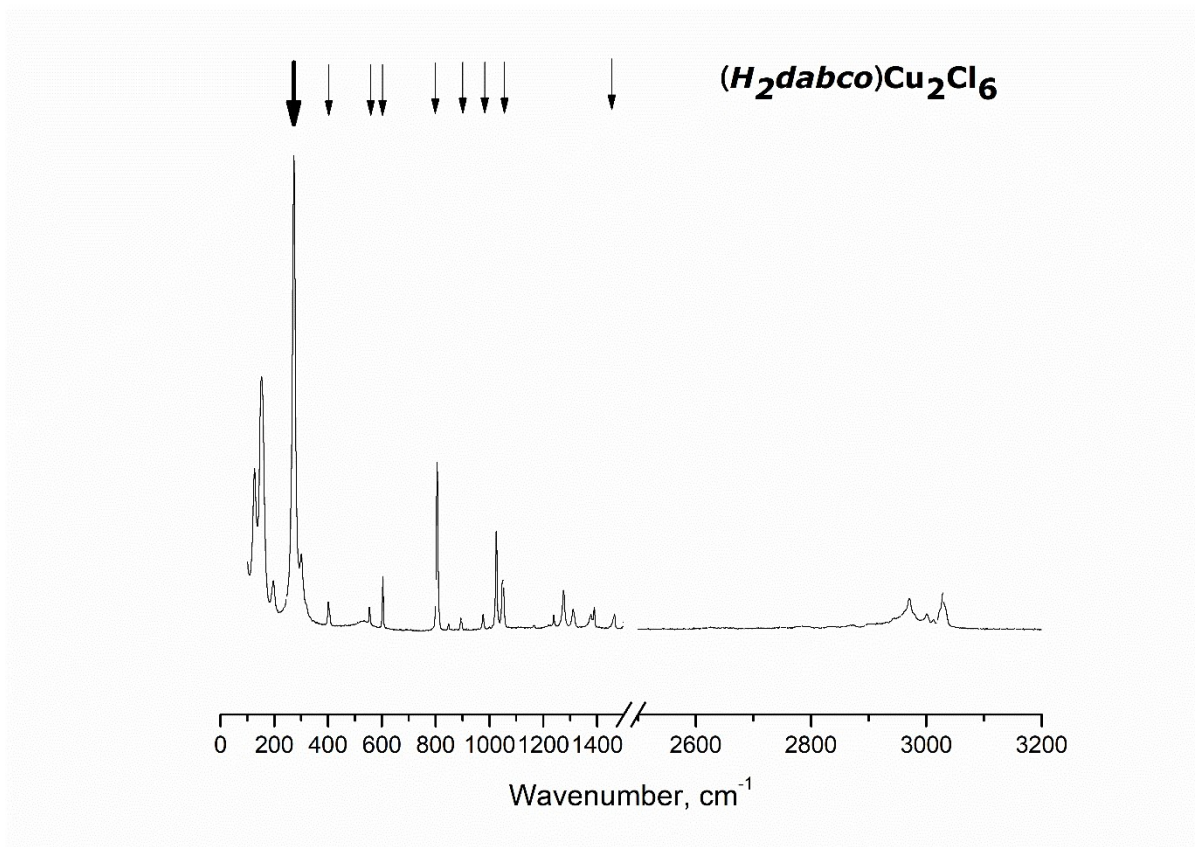

Figure S5. Raman-spectrum of  $(H_2dabco)Cu_2Cl_6$  compound. Thin arrows depict peaks originated from organic part, thick arrow marks  $\nu_s$  mode of the copper-chlorine anion.
